# Supplementary material for: Comparative Analysis of Impatiens Leaf Transcriptomes Reveal Candidate Genes for Resistance to Downy Mildew Caused by Plasmopara obducens
Source: MDPI journal article supplement (doi:10.3390/ijms19072057), 2018-07-15
Supplement: s1 [file s1]

**Table S1:** Length distribution of unigenes of cultivars Super Elfin® XP Pink (SEP) and SunPatiens® Compact Royal Magenta (SPR)

**Table S2:** Length distribution of contigs of cultivars Super Elfin® XP Pink (SEP) and SunPatiens® Compact Royal Magenta (SPR)

**Table S3:** Differentially expressed disease resistance genes

**Table S4:** Single Sequence Repeat primers

**Table S5:** Single nucleotide polymorphisms (SNPs) in garden impatiens, Super Elfin XP Pink (SEP) cultivar

**Table 76:** Single nucleotide polymorphisms (SNPs) in New Guinea impatiens, Sun Patiens Compact Royal Magenta (SPR) cultivar

**Table S7:** List of single nucleotide polymorphisms (SNPS) with their position and presence in specific cultivars of impatiens

**Table S8:** List of single nucleotide polymorphisms (SNPs) identified in the unigenes that are putatively involved in disease resistance in Impatiens
